# Supplementary material for: Consistency and Variability of the Human Milk Oligosaccharide Profile in Repeat Pregnancies
Source: MDPI journal article supplement (doi:10.3390/nu16050643), 2024-02-25
Supplement: s1 [file s1]

# Consistency and variability of the human milk oligosaccharide profile in repeat pregnancies

Simone Renwick <sup>1,2</sup>, Kamand Rahimi <sup>1</sup>, Kristija Sejane <sup>1</sup>, Kerri Bertrand <sup>1,3,4</sup>, Christina Chambers <sup>1,3,4,5</sup>, and Lars Bode <sup>1,2,5,\*</sup>

<sup>1</sup> Department of Pediatrics, School of Medicine, University of California San Diego, La Jolla, CA 92093; [srenwick@health.ucsd.edu](mailto:srenwick@health.ucsd.edu) (S.R.); [karahimi@health.ucsd.edu](mailto:karahimi@health.ucsd.edu) (K.R.); [ksejane@health.ucsd.edu](mailto:ksejane@health.ucsd.edu) (K.S.); [kdutcher@health.ucsd.edu](mailto:kdutcher@health.ucsd.edu) (K.B.); [chchambers@health.ucsd.edu](mailto:chchambers@health.ucsd.edu) (C.C.)

<sup>2</sup> Mother-Milk-Infant Center of Research Excellence, University of California San Diego, La Jolla, CA 92093

<sup>3</sup> Mommy's Milk Human Milk Research Biorepository, San Diego, CA 92123

<sup>4</sup> Herbert Wertheim School of Public Health and Human Longevity Science, University of California San Diego, La Jolla, CA 92093

<sup>5</sup> Human Milk Institute, University of California San Diego, La Jolla, CA 92093

\* Correspondence: [lbode@health.ucsd.edu](mailto:lbode@health.ucsd.edu) (L.B.)

## Supplementary Material

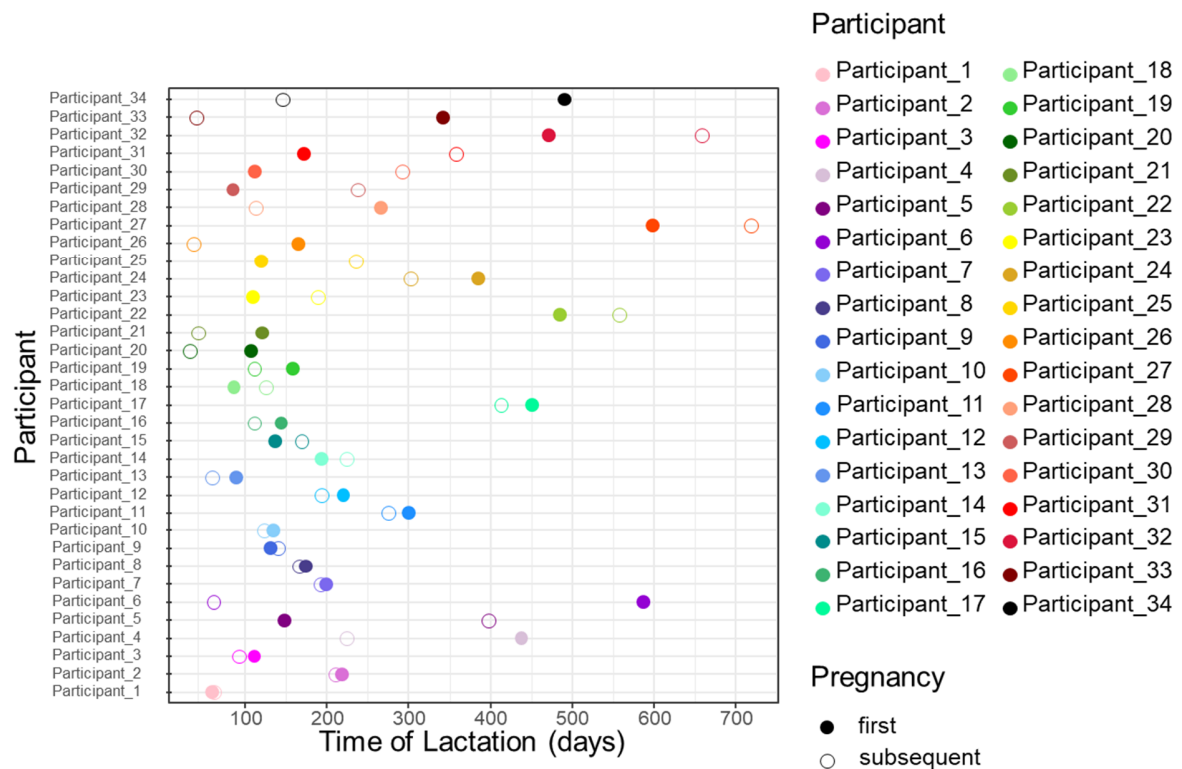

**Supplementary Material Figure S1.** Time of lactation (days) of samples provided by each participant following their first and subsequent pregnancies.
